# Supplementary material for: Cooperativity in beryllium bonds
Source: Royal Society of Chemistry journal article supplement (doi:10.1039/c3cp55168g), 2014-01-01
Supplement: c3cp55168g.pdf [file c3cp55168g.pdf]

## Supporting Information

### Cooperativity in Beryllium Bonds

Ibon Alkorta, Jose Elguero, Manuel Yáñez, Otilia Mó

Table S1. Calculated interatomic distances (Å) with respect to its position along the cluster chain.

| C-Be | 1H    | (1H) <sub>2</sub> | (1H) <sub>3</sub> | (1H) <sub>4</sub> | (1H) <sub>5</sub> | (1H) <sub>6</sub> | (1H) <sub>7</sub> | (1H) <sub>8</sub> | (1H) <sub>9</sub> | (1H) <sub>10</sub> |
|------|-------|-------------------|-------------------|-------------------|-------------------|-------------------|-------------------|-------------------|-------------------|--------------------|
| 1    | 1.701 | 1.738             | 1.745             | 1.748             | 1.750             | 1.750             | 1.751             | 1.751             | 1.751             | 1.751              |
| 2    |       | 1.719             | 1.755             | 1.762             | 1.765             | 1.767             | 1.767             | 1.768             | 1.768             | 1.768              |
| 3    |       |                   | 1.725             | 1.760             | 1.767             | 1.770             | 1.771             | 1.772             | 1.772             | 1.773              |
| 4    |       |                   |                   | 1.727             | 1.762             | 1.769             | 1.772             | 1.773             | 1.774             | 1.774              |
| 5    |       |                   |                   |                   | 1.728             | 1.763             | 1.770             | 1.773             | 1.774             | 1.775              |
| 6    |       |                   |                   |                   |                   | 1.729             | 1.763             | 1.770             | 1.773             | 1.775              |
| 7    |       |                   |                   |                   |                   |                   | 1.729             | 1.764             | 1.771             | 1.774              |
| 8    |       |                   |                   |                   |                   |                   |                   | 1.729             | 1.764             | 1.771              |
| 9    |       |                   |                   |                   |                   |                   |                   |                   | 1.729             | 1.764              |
| 10   |       |                   |                   |                   |                   |                   |                   |                   |                   | 1.729              |

  

| C-Be | 1F    | (1F) <sub>2</sub> | (1F) <sub>3</sub> | (1F) <sub>4</sub> | (1F) <sub>5</sub> | (1F) <sub>6</sub> | (1F) <sub>7</sub> | (1F) <sub>8</sub> | (1F) <sub>9</sub> | (1F) <sub>10</sub> |
|------|-------|-------------------|-------------------|-------------------|-------------------|-------------------|-------------------|-------------------|-------------------|--------------------|
| 1    | 1.706 | 1.737             | 1.744             | 1.748             | 1.750             | 1.750             | 1.751             | 1.751             | 1.751             | 1.751              |
| 2    |       | 1.716             | 1.752             | 1.759             | 1.762             | 1.764             | 1.765             | 1.766             | 1.765             | 1.766              |
| 3    |       |                   | 1.720             | 1.757             | 1.764             | 1.767             | 1.769             | 1.770             | 1.770             | 1.770              |
| 4    |       |                   |                   | 1.722             | 1.759             | 1.766             | 1.769             | 1.771             | 1.771             | 1.772              |
| 5    |       |                   |                   |                   | 1.723             | 1.759             | 1.767             | 1.770             | 1.771             | 1.772              |
| 6    |       |                   |                   |                   |                   | 1.724             | 1.760             | 1.767             | 1.770             | 1.772              |
| 7    |       |                   |                   |                   |                   |                   | 1.724             | 1.761             | 1.768             | 1.771              |
| 8    |       |                   |                   |                   |                   |                   |                   | 1.724             | 1.760             | 1.768              |
| 9    |       |                   |                   |                   |                   |                   |                   |                   | 1.724             | 1.760              |
| 10   |       |                   |                   |                   |                   |                   |                   |                   |                   | 1.724              |

#### Cyclic complexes, C-Be distance

|                    |       |                    |       |
|--------------------|-------|--------------------|-------|
| (1H) <sub>4</sub>  | 1.784 | (1F) <sub>4</sub>  | 1.797 |
| (1H) <sub>5</sub>  | 1.780 | (1F) <sub>5</sub>  | 1.788 |
| (1H) <sub>6</sub>  | 1.783 | (1F) <sub>6</sub>  | 1.784 |
| (1H) <sub>7</sub>  | 1.781 | (1F) <sub>7</sub>  | 1.781 |
| (1H) <sub>8</sub>  | 1.781 | (1F) <sub>8</sub>  | 1.780 |
| (1H) <sub>9</sub>  | 1.781 | (1F) <sub>9</sub>  | 1.780 |
| (1H) <sub>10</sub> | 1.778 | (1F) <sub>10</sub> | 1.780 |

| Be-N | (1H) <sub>2</sub> | (1H) <sub>3</sub> | (1H) <sub>4</sub> | (1H) <sub>5</sub> | (1H) <sub>6</sub> | (1H) <sub>7</sub> | (1H) <sub>8</sub> | (1H) <sub>9</sub> | (1H) <sub>10</sub> |
|------|-------------------|-------------------|-------------------|-------------------|-------------------|-------------------|-------------------|-------------------|--------------------|
| 1    | 1.738             | 1.713             | 1.706             | 1.703             | 1.702             | 1.701             | 1.701             | 1.701             | 1.701              |
| 2    |                   | 1.717             | 1.692             | 1.685             | 1.682             | 1.681             | 1.680             | 1.679             | 1.679              |
| 3    |                   |                   | 1.711             | 1.685             | 1.678             | 1.675             | 1.674             | 1.673             | 1.673              |
| 4    |                   |                   |                   | 1.708             | 1.683             | 1.676             | 1.672             | 1.671             | 1.670              |
| 5    |                   |                   |                   |                   | 1.707             | 1.681             | 1.674             | 1.671             | 1.670              |
| 6    |                   |                   |                   |                   |                   | 1.706             | 1.681             | 1.673             | 1.670              |
| 7    |                   |                   |                   |                   |                   |                   | 1.706             | 1.680             | 1.673              |

|      |                   |                   |                   |                   |                   |                   |                   |                   |                    |
|------|-------------------|-------------------|-------------------|-------------------|-------------------|-------------------|-------------------|-------------------|--------------------|
|      | 8                 |                   |                   |                   |                   |                   |                   | 1.706             | 1.680              |
|      | 9                 |                   |                   |                   |                   |                   |                   |                   | 1.706              |
| Be-N | (1F) <sub>2</sub> | (1F) <sub>3</sub> | (1F) <sub>4</sub> | (1F) <sub>5</sub> | (1F) <sub>6</sub> | (1F) <sub>7</sub> | (1F) <sub>8</sub> | (1F) <sub>9</sub> | (1F) <sub>10</sub> |
| 1    | 1.750             | 1.722             | 1.714             | 1.710             | 1.709             | 1.708             | 1.708             | 1.707             | 1.707              |
| 2    |                   | 1.726             | 1.697             | 1.689             | 1.685             | 1.684             | 1.683             | 1.683             | 1.682              |
| 3    |                   |                   | 1.718             | 1.689             | 1.681             | 1.678             | 1.676             | 1.676             | 1.675              |
| 4    |                   |                   |                   | 1.714             | 1.686             | 1.678             | 1.674             | 1.673             | 1.672              |
| 5    |                   |                   |                   |                   | 1.713             | 1.684             | 1.676             | 1.673             | 1.672              |
| 6    |                   |                   |                   |                   |                   | 1.713             | 1.683             | 1.676             | 1.672              |
| 7    |                   |                   |                   |                   |                   |                   | 1.712             | 1.683             | 1.675              |
| 8    |                   |                   |                   |                   |                   |                   |                   | 1.711             | 1.683              |
| 9    |                   |                   |                   |                   |                   |                   |                   |                   | 1.711              |

Cyclic complexes, Be-N distance

|                    |       |                    |       |
|--------------------|-------|--------------------|-------|
| (1H) <sub>4</sub>  | 1.700 | (1F) <sub>4</sub>  | 1.706 |
| (1H) <sub>5</sub>  | 1.684 | (1F) <sub>5</sub>  | 1.689 |
| (1H) <sub>6</sub>  | 1.679 | (1F) <sub>6</sub>  | 1.681 |
| (1H) <sub>7</sub>  | 1.672 | (1F) <sub>7</sub>  | 1.673 |
| (1H) <sub>8</sub>  | 1.668 | (1F) <sub>8</sub>  | 1.668 |
| (1H) <sub>9</sub>  | 1.666 | (1F) <sub>9</sub>  | 1.666 |
| (1H) <sub>10</sub> | 1.670 | (1F) <sub>10</sub> | 1.665 |

Table S2.  $E_i$  Interaction energy ( $\text{kJ mol}^{-1}$ ) of the linear and cyclic structures calculated at the B3LYP/6-31+G(d,p) and B3LYP/6-311++G(3df,2p) computational levels.

| System             | X = H                 |                            |                       |                            | X=F                   |                            |                       |                            |
|--------------------|-----------------------|----------------------------|-----------------------|----------------------------|-----------------------|----------------------------|-----------------------|----------------------------|
|                    | Linear                |                            | Cyclic                |                            | Linear                |                            | Cyclic                |                            |
|                    | B3LYP/<br>6-31+G(d,p) | B3LYP/<br>6-311++G(3df,2p) | B3LYP/<br>6-31+G(d,p) | B3LYP/<br>6-311++G(3df,2p) | B3LYP/<br>6-31+G(d,p) | B3LYP/<br>6-311++G(3df,2p) | B3LYP/<br>6-31+G(d,p) | B3LYP/<br>6-311++G(3df,2p) |
| (1X) <sub>2</sub>  | -122.6                | -119.0                     |                       |                            | -121.2                | -115.3                     |                       |                            |
| (1X) <sub>3</sub>  | -280.4                | -274.0                     |                       |                            | -280.3                | -268.4                     |                       |                            |
| (1X) <sub>4</sub>  | -450.5                | -441.3                     | -639.1                | -631.6                     | -451.8                | -434.0                     | -624.8                | -607.7                     |
| (1X) <sub>5</sub>  | -626.2                | -614.4                     | -860.7                | -850.0                     | -629.4                | -605.6                     | -852.6                | -828.1                     |
| (1X) <sub>6</sub>  | -804.5                | -790.1                     | -1064.4               | -1047.9                    | -809.9                | -780.2                     | -1066.4               | -1034.6                    |
| (1X) <sub>7</sub>  | -984.5                | -967.5                     | -1253.6               | -1234.6                    | -991.9                | -956.2                     | -1263.1               | -1225.5                    |
| (1X) <sub>8</sub>  | -1165.2               | -1145.6                    | -1430.4               | -1408.8                    | -1174.7               | -1133.0                    | -1448.5               | -1404.7                    |
| (1X) <sub>9</sub>  | -1346.8               | -1324.5                    | -1601.1               | -1576.6                    | -1358.9               | -1311.2                    | -1628.7               | -1577.7                    |
| (1X) <sub>10</sub> | -1528.3               | -1503.5                    | -1778.6               | -1739.0                    | -1542.9               | -1489.2                    | -1803.3               | -1746.1                    |

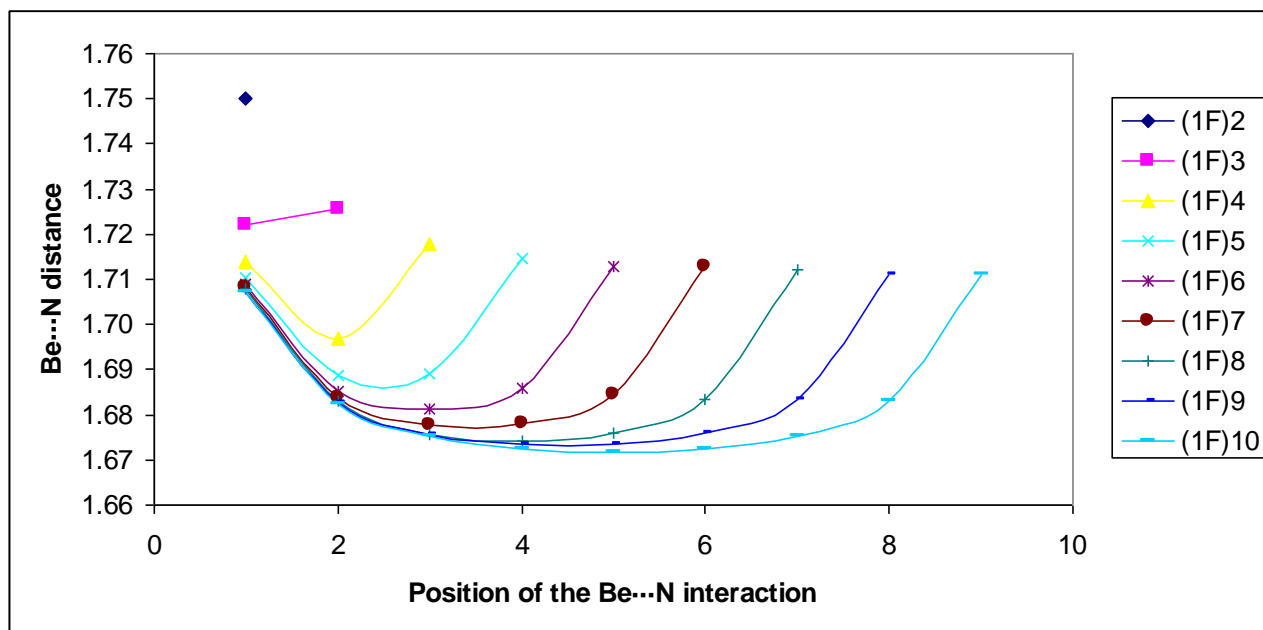

Figure S1. Evolution of the Be...N distance (Å) in the linear chain of the 1F clusters.

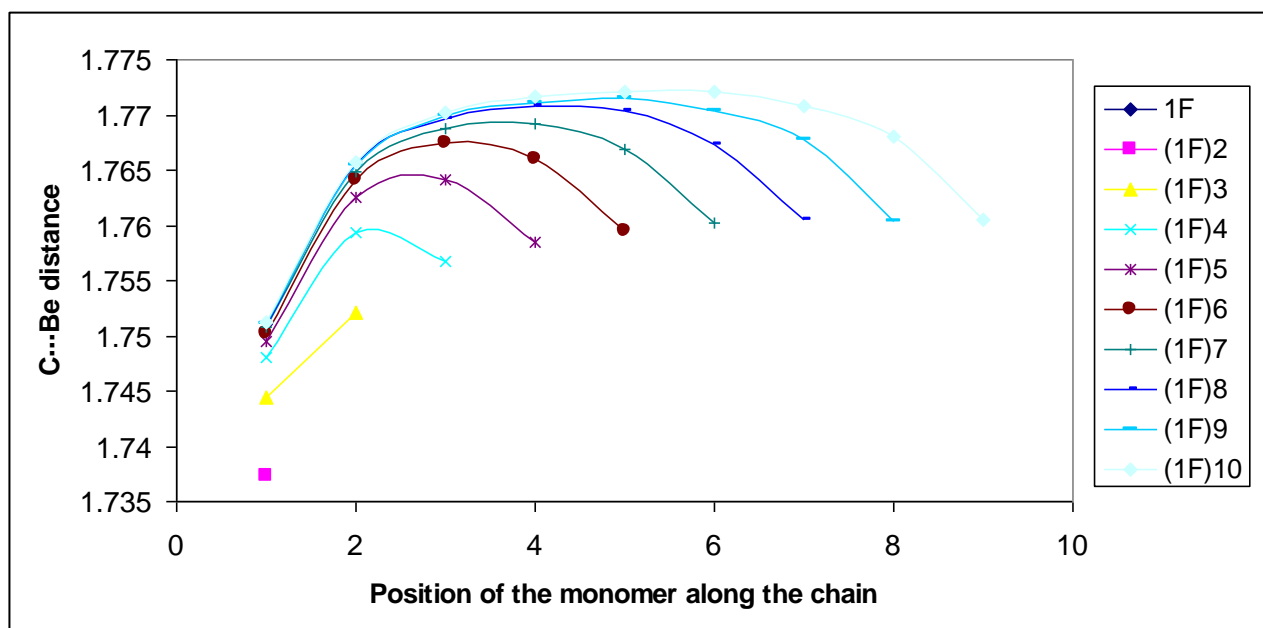

Fig. S2. Evolution of the C...Be distance (Å) in the linear chain of the 1F clusters

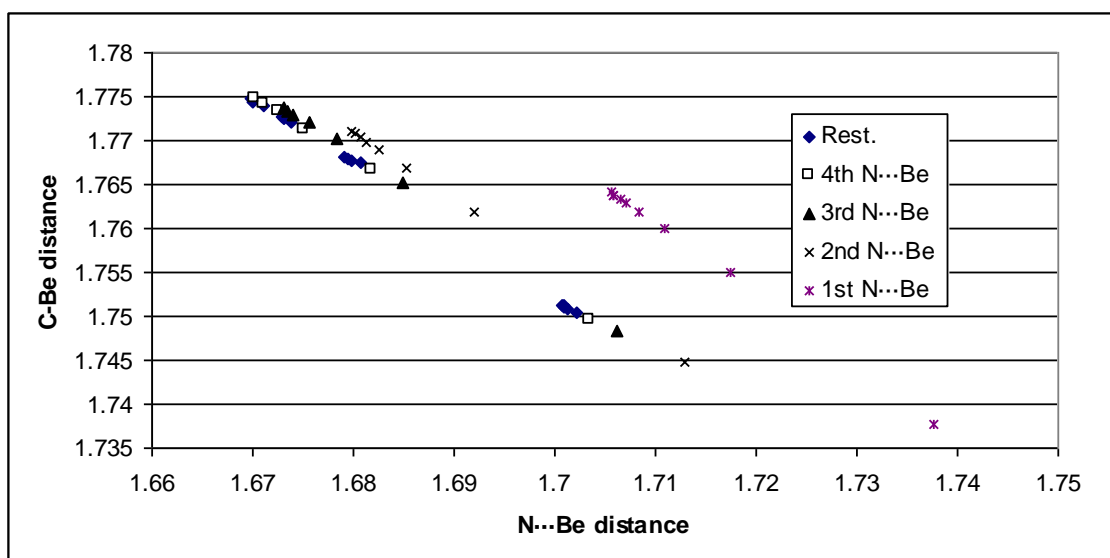

Figure S3. Relationship between the N...Be distance and C-Be distance (Å) based on the interaction position in the chain.

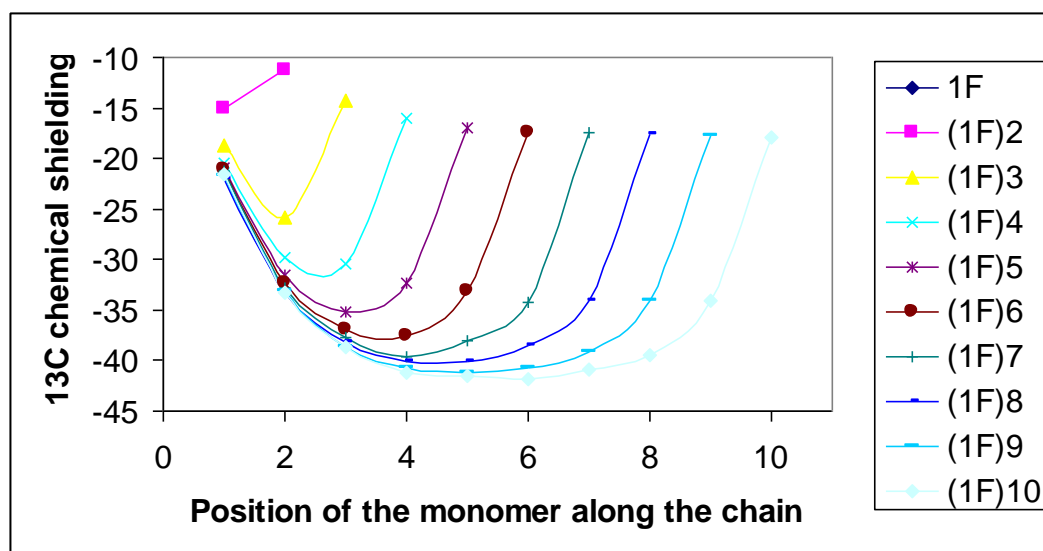

Fig. S4 Absolute chemical shift of the C atoms vs. the position of the monomers in the chain for the 1F series
